# Supplementary material for: Source apportionment of carbonaceous aerosols in Beijing with radiocarbon and organic tracers: insight into the differences between urban and rural sites
Source: Copernicus journal article supplement (doi:10.5194/acp-21-8273-2021), 2021-05-28
Supplement: Supplementary file 1 [file acp-21-8273-2021-supplement.pdf]

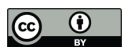

*Supplement of*

**Source apportionment of carbonaceous aerosols in Beijing with radiocarbon and organic tracers: insight into the differences between urban and rural sites**

**Siqi Hou et al.**

*Correspondence to:* Roy M. Harrison ([r.m.harrison@bham.ac.uk](mailto:r.m.harrison@bham.ac.uk)) and Zongbo Shi ([z.shi@bham.ac.uk](mailto:z.shi@bham.ac.uk))

The copyright of individual parts of the supplement might differ from the article licence.

## 7 **Influence from Regional Transport**

8 During the wintertime, air masses transported to Beijing were mainly from Inner Mongolia, Shanxi  
9 and Hebei, where the open burning activities were associated with maize straw (Zhang et al., 2019).  
10 During summer, air masses from Shandong, Hebei, Liaoning and Tianjin may bring particles from  
11 burning of wheat straw. However, for Inner Mongolia and Shanxi, little wheat is grown in these areas  
12 (Zhang et al., 2019; Zhou et al., 2017) and the influence of wheat straw burning is less important. The  
13 fire spot intensity, transport direction and sources of biomass burning are summarized in Table S1.

14 The high fire spot intensity indicates a strong likelihood of regional transport. However, the  
15 concentrations of LG would decrease with atmospheric transport by aging, varying with  
16 environmental conditions (Bhattarai et al., 2019), which can be used to infer the influence from  
17 regional transport and local emissions. For example, with similar  $PM_{2.5}$  concentrations, the LG  
18 concentration on 26 November was much lower than that on 3 December. Considering the different  
19 intensity of fire spots between the two days, LG on 26 November may arise more from regional  
20 transport instead of local emissions. Moreover, the LG concentration on 2 December was similar to  
21 that on 3 December, but the  $PM_{2.5}$  concentration was much lower. This implies a contribution from  
22 local sources in addition to regional transport on 2 December.

## 23 **Detailed Method of Ratio Selection and Sensitivity Test for Quantification of Biomass Burning**

24 As mentioned in the main text, softwood, maize straw and wheat straw are the main types of biomass  
25 fuels used within the region. The ratios of EC/OC and OC/LG from softwood, maize straw and wheat  
26 straw are summarized in Table S2.

27 As the fraction of LG from wood burning ( $f_{\text{wood}}$ ) and straw burning ( $f_{\text{straw}} = 1 - f_{\text{wood}}$ ) are each in the  
28 range of 0 to 1, only those matching this limitation were selected when calculating  $OC_{\text{bb}}$ . Emission  
29 factors of LG from various biofuels showed that the LG emission from wheat straw was hundreds of  
30 times higher than from the values for wood combustion, while the emission factors are similar

31 between maize and wood (Yan et al., 2018). It means that although the consumption of wheat straw  
 32 may be less than that of wood, LG emission from wheat straw may exceed that from wood, and  $f_{\text{wood}}$   
 33 may be quite small in summer. Besides, the sum of calculated  $\text{OC}_{\text{straw}}$  and  $\text{OC}_{\text{wood}}$  should not exceed  
 34 the measured  $\text{OC}_{\text{nf}}$  concentrations, which is another limitation for selecting EC/OC and OC/LG ratios.  
 35 Hence, ratios of softwood from No. 25 to No. 37 in Table S3 with ratios of maize (No. 48 in Table  
 36 S3) were used for the wintertime, and No. 30-37 with No. 42-45, 50 from softwood and wheat straw  
 37 respectively were used in the summertime estimation of  $f_{\text{wood}}$

38  $\text{OC}_{\text{bb}}$  from each type of softwood and crop straw combination can be estimated once  $f_{\text{wood}}$  was  
 39 confirmed, and then these were averaged. To further assess the sensitivity of the calculated  $\text{OC}_{\text{bb}}$   
 40 results to the different ratio sets, concentrations of  $\text{OC}_{\text{bb}}$  for each set of ratios have been plotted vs.  
 41 the averaged values (Fig. S4). Compared to  $\text{OC}_{\text{wood}}$ , concentrations of  $\text{OC}_{\text{straw}}$  show a small spread,  
 42 and are in narrow ranges. It means the  $\text{OC}_{\text{straw}}$  are less affected by the varying ratios, as the range of  
 43 ratios is smaller. According to Fig. S4, there are large uncertainties attached to the estimated values  
 44 of  $\text{OC}_{\text{wood}}$ , but not  $\text{OC}_{\text{straw}}$ . The uncertainties from  $\text{OC}_{\text{bb}}$  can further affect the estimation of OC from  
 45 cooking, but have no influence on estimates of SOC, which are determined from the  $(\text{OC}/\text{EC})_{\text{min}}$   
 46 ratios. The accuracy of this extended Gelencsér method would increase if the softwood types and  
 47 ratios were confirmed.

48 The concentrations and contributions of  $\text{OC}_{\text{bb}}$  are shown in Fig. S5. The uncertainties of  $\text{OC}_{\text{bb}}$  are  
 49 calculated considering the uncertainties of  $\text{EC}_{\text{nf}}$  and LG:

$$50 \quad u(\text{OC}_{\text{bb}}) = \sqrt{\sum \left[ \left( \frac{a-b}{ac-bd} \right)^2 u(\text{EC}_{\text{nf}})^2 + \left( \frac{abc-abd}{ac-bd} \right)^2 u(\text{LG})^2 \right]}$$

51 where  $a = (\text{OC}/\text{LG})_{\text{wood}}$ ,  $b = (\text{OC}/\text{LG})_{\text{straw}}$ ,  $c = (\text{EC}/\text{OC})_{\text{wood}}$ , and  $d = (\text{EC}/\text{OC})_{\text{straw}}$ .

52 The average uncertainty of the LG concentration is 15%. The uncertainty of  $EC_{nf}$  is calculated by  
 53 combining all the uncertainties from EC concentrations,  $f_{NF}$ ,  $f_M$  and  $f_{ref}$ . The average uncertainty of  
 54  $OC_{bb}$  is 48.6%.

55 **Determination of  $(OC/EC)_{f, min}$  and  $(OC/EC)_{nf, min}$  ratios and the estimation of  $POC_f$  and  $POC_{nf}$**

56 OC/EC ratios are seen as an indicator of aerosol emission sources to estimate the POC and SOC  
 57 concentrations.  $^{14}C$  analysis can provide OC to EC ratios from fossil and non-fossil sources ( $(OC/EC)_f$   
 58 and  $(OC/EC)_{nf}$ ). Herein, we use the lowest  $(OC/EC)_f$  and  $(OC/EC)_{nf}$  ratios ( $(OC/EC)_{f, min}$  and  
 59  $(OC/EC)_{nf, min}$ , respectively) to represent primary OC/EC emission ratio to calculate primary fossil-  
 60 derived and non-fossil-derived OC ( $POC_f$  and  $POC_{nf}$ ) respectively. To avoid the overestimation of  
 61  $POC_f$  and  $POC_{nf}$  from the measured  $(OC/EC)_{f, min}$  and  $(OC/EC)_{nf, min}$  due to the limited samples for  
 62  $^{14}C$  analysis in this study, it is necessary to evaluate  $(OC/EC)_{nf, min}$  and  $(OC/EC)_{f, min}$  ratios for the  
 63 whole sampling period.

64 The relationship of  $(OC/EC)_{nf}$  and  $(OC/EC)_f$  with OC/EC can be described as follow,

65 
$$\left(\frac{OC}{EC}\right)_{nf} = \frac{f_{NF,OC}}{f_{NF,EC}} \times \frac{OC}{EC}$$

66 
$$\left(\frac{OC}{EC}\right)_f = \left(\frac{1-f_{NF,OC}}{1-f_{NF,EC}}\right) \times \frac{OC}{EC}$$

67 where  $f_{NF, OC}$  and  $f_{NF, EC}$  are the non-fossil fractions of OC and EC,  $(1 - f_{NF, OC})$  and  $(1 - f_{NF, EC})$  are the  
 68 fossil fractions of OC and EC.

69 Ratios of  $(OC/EC)_{nf}$  are determined by  $\frac{f_{NF,OC}}{f_{NF,EC}}$  and OC/EC, therefore  $(OC/EC)_{nf, min}$  can be roughly  
 70 quantified by multiplying the lowest 5% OC/EC ratios with the lowest two  $\frac{f_{NF,OC}}{f_{NF,EC}}$  ratios. Similarly,  
 71  $(OC/EC)_{f, min}$  can be estimated by multiplying the lowest 5% OC/EC ratios with the lowest two  
 72  $\left(\frac{1-f_{NF,OC}}{1-f_{NF,EC}}\right)$  ratios. The estimated  $(OC/EC)_{nf, min}$  and  $(OC/EC)_{f, min}$  ratios for IAP and PG sites in winter

73 and summer sampling period were listed in Table S4. The estimated  $(OC/EC)_{nf, min}$  and  $(OC/EC)_{f, min}$   
74 ratios are within the values of OC/EC emission ratios from coal combustion (1.5-15), traffic emission  
75 (0.69-1.01), and biomass burning (3-7) (Ni et al., 2018). Higher  $(OC/EC)_{f, min}$  ratios in winter are  
76 consistent with the fact of elevated coal combustion compared to traffic emissions. It indicated the  
77 evaluation of  $(OC/EC)_{nf, min}$  and  $(OC/EC)_{f, min}$  ratios are reasonable.

## 78 **Discussion of OC from cooking and OC from other potential non-fossil sources.**

79 Cholesterol is an organic marker which is used to calculate OC from cooking in previous study. Thus,  
80 calculations of  $OC_{ck-ch}$  by cholesterol concentrations multiplying OC to cholesterol ratios (Zhao et al.,  
81 2015; Wu et al., 2021) were conducted to compare the EG method result ( $OC_{ck-EG}$ ). The  
82 concentrations of cholesterol in 25 selected samples with the corresponding OC from cooking ( $OC_{ck-}$   
83  $ch$ ) are summarized in Table S5. The methodology of cholesterol determination is described in Xu et.  
84 al (2020). The average concentrations of  $OC_{ck-ch}$  are  $2.08 \pm 1.16 \mu g m^{-3}$  and  $1.64 \pm 1.01 \mu g m^{-3}$  at IAP  
85 in winter and summer,  $2.65 \pm 1.06 \mu g m^{-3}$  and  $0.92 \pm 0.43 \mu g m^{-3}$  at PG in winter and summer. The  
86  $OC_{ck-ch}$  concentrations are 1.8 times higher than the  $OC_{ck}$  from the EG method ( $OC_{ck-EG}$ ) on average  
87 at IAP, and will result in the values of  $OC_{bb} + OC_{ck-ch}$  being much higher than  $POC_{nf}$ . It is suggested  
88 that the  $OC_{ck-ch}$  may contain some secondary OC. At PG, however, concentrations of  $OC_{ck-ch}$  are only  
89 half of  $OC_{ck-EG}$ . the  $OC_{ck-EG}$  is calculated by subtracting  $OC_{bb}$  from  $POC_{nf}$  assuming it arises mainly  
90 from cooking. Here, the much higher  $OC_{ck-EG}$  than  $OC_{ck-ch}$  at PG suggest that the  $OC_{ck-EG}$  may include  
91 other primary sources.

92 Comparisons of  $OC_{ck-ch}$  with  $OC_{ck-EG}$ ,  $OC_{ck}$  from the CMB model and cooking OC from  
93 AMS/ACSM-PMF are shown in Figure 1(Figure S8 in SI). The concentrations of  $OC_{ck-ch}$  are not well  
94 correlated with CMB results or AMS/ACSM-PMF results. But the  $OC_{ck-ch}$  values are 6.5 times higher  
95 than CMB results on average, and 0.91 times the AMS/ACSM-PMF results. It is possible that the  
96  $OC_{ck-ch}$  may contain secondary OC.

97 OC<sub>ck-ch</sub> at PG is half of OC<sub>ck-EG</sub>. We found the differences between OC<sub>ck-EG</sub> and OC<sub>ck-ch</sub> (OC<sub>onf</sub>) at PG  
98 are positively correlated with crustal elements, Si, Al, Fe and Ti (shown in Figure 2, Figure S9 in SI).  
99 This indicates that the OC<sub>ck-EG</sub> may include OC fractions from primary sources like dust. The filters  
100 collected during the APHH-campaign have been subject to elemental analysis with XRF and ICP-  
101 MS. The detailed methods of elemental analysis can be found in Srivastava et al (2020).

102 Enrichment factors (EFs) can be used to study the degree of elemental enrichment in ambient particles  
103 and can also help to determine whether they are from natural or anthropogenic emissions. The  
104 calculation of EFs are as follow,

$$105 \quad EF = \frac{\left(\frac{C_x}{C_{Al}}\right)_{PM_{2.5}}}{\left(\frac{C_x}{C_{Al}}\right)_{Soil}}$$

106 Where,  $\left(\frac{C_x}{C_{Al}}\right)_{PM_{2.5}}$  is the concentration ratio of x to Al in the measured PM<sub>2.5</sub> samples,  
107  $\left(\frac{C_x}{C_{Al}}\right)_{Soil}$  is the concentration ratio of x to Al of fugitive dust in Chinese Loess Plateau (Cao et  
108 al., 2008), respectively. Here, Al is the reference element due to its stability and immunity to human  
109 interference (Uematsu et al., 1983; Zhang et al., 2003).

110 The EFs of Si, Fe and Ti are listed in Table 1 (shown as Table S5 in SI). EF(Si) is in the range of 0.41  
111 to 1.07, indicating that Si is mostly from natural sources. EF(Fe) and EF(Ti) are in range of 0.02-  
112 10.82 and 0-6.38, respectively, indicating that Fe and Ti are from mixed sources. Thus, we used Si  
113 concentrations and the Si to OC ratio from the Chinese Loess Plateau (Cao et al., 2008) and from  
114 Beijing road dust samples (Hu et al., 2019) to calculate a possible range OC from dust (OC<sub>dt</sub>). We  
115 also calculate OC from dust (OC<sub>dt-Al</sub>) using Al concentrations and the Al to OC ratio for comparison.  
116 The ranges of OC<sub>dt</sub> and OC<sub>dt-Al</sub> are listed in Table 1. The OC<sub>dt</sub> and OC<sub>dt-Al</sub> would result in a  
117 contribution to OC of 0.1-22.8% and 0.2-22.1%, respectively. And the calculated OC<sub>dt</sub> would  
118 contribute 1.9% to 192.5% of OC<sub>onf</sub> for PG site. It implies the OC from dust may be a major  
119 contributor to the primary non-fossil sources at PG.

120 Our other research on source apportionment of PM<sub>2.5</sub> using PMF has presented a detailed study of  
121 dust contributions (Srivastava et al., 2020). It showed that the crustal dust made a significant  
122 contribution to OC and EC. But it cannot clearly be attributed to soil dust or road dust, and contains  
123 mixed characteristics. The estimated dust contributions in urban Beijing were 12.7% during haze  
124 periods (PM<sub>2.5</sub> > 75 µg m<sup>-3</sup>) and 35.2% during non-haze periods (PM<sub>2.5</sub> < 75 µg m<sup>-3</sup>). The huge  
125 discrepancy between the methods is not easily explained, but Srivastava et al. (2020) urge caution in  
126 accepting their results.

127 **References**

- 128 Bhattarai, H., Saikawa, E., Wan, X., Zhu, H., Ram, K., Gao, S., Kang, S., Zhang, Q., Zhang, Y., Wu,  
129 G., Wang, X., Kawamura, K., Fu, P., and Cong, Z.: Levoglucosan as a tracer of biomass burning:  
130 Recent progress and perspectives, *Atmos. Res.*, 220, <https://doi.org/10.1016/j.atmosres.2019.01.004>  
131 20-33, 2019.
- 132 Cao, J. J., Chow, J. C., Watson, J. G., Wu, F., Han, Y. M., Jin, Z. D., Shen, Z. X., and An, Z. S.: Size-  
133 differentiated source profiles for fugitive dust in the Chinese Loess Plateau, *Atmos. Environ.*, 42,  
134 2261-2275, <https://doi.org/10.1016/j.atmosenv.2007.12.041>, 2008.
- 135 Dhammapala, R., Claiborn, C., Jimenez, J., Corkill, J., Gullett, B., Simpson, C., and Paulsen, M.:  
136 Emission factors of PAHs, methoxyphenols, levoglucosan, elemental carbon and organic carbon from  
137 simulated wheat and Kentucky bluegrass stubble burns, *Atmos. Environ.*, 41, 2660-2669,  
138 <https://doi.org/10.1016/j.atmosenv.2006.11.023>, 2007.
- 139 Fine, P. M., Cass, G. R., and Simoneit, B. R. T.: Chemical characterization of fine particle emissions  
140 from fireplace combustion of woods grown in the northeastern United States, *Environ. Sci. Technol.*,  
141 35, 2665-2675, <https://doi.org/10.1021/es001466k>, 2001.
- 142 Fine, P. M., Cass, G. R. and Simoneit, B. R. T.: Chemical characterization of fine particle emissions  
143 from the fireplace combustion of woods grown in the southern United States, *Environ. Sci. Technol.*,  
144 36, 1442-1451, <https://doi.org/10.1021/es0108988>, 2002.
- 145 Fine, P. M., Cass, G. R., and Simoneit, B. R. T.: Chemical characterization of fine particle emissions  
146 from the wood stove combustion of prevalent United States tree species, *Environ. Eng. Sci.*, 21, 705-  
147 721, <https://doi.org/10.1089/ees.2004.21.705>, 2004.
- 148 Fushimi, A., Saitoh, K., Hayashi, K., Ono, K., Fujitani, Y., Villalobos, A. M., Shelton, B. R., Takami,  
149 A., Tanabe, K. & Schauer, J. J.: Chemical characterization and oxidative potential of particles  
150 emitted from open burning of cereal straws and rice husk under flaming and smoldering conditions,  
151 *Atmos. Environ.*, 163, 118-127, <https://doi.org/10.1016/j.atmosenv.2017.05.037>, 2017.
- 152 Gonçalves, C., Alves, C., Evtugina, M., Mirante, F., Pio, C., Caseiro, A., Schmidl, C., Bauer, H.,  
153 and Carvalho, F.: Characterisation of PM<sub>10</sub> emissions from woodstove combustion of common  
154 woods grown in Portugal, *Atmos. Environ.*, 44, 4474-4480,  
155 <https://doi.org/10.1016/j.atmosenv.2010.07.026>, 2010.
- 156 Hays, M. D., Geron, C. D., Linna, K. J., Smith, N. D., and Schauer, J. J.: Speciation of gas-phase  
157 and fine particle emissions from burning of foliar fuels, *Environ. Sci. Technol.*, 36, 2281-2295,  
158 <https://doi.org/10.1021/es0111683>, 2002.



- 159 Hays, M. D., Fine, P. M., Geron, C. D., Kleeman, M. J., and Gullett, B. K.: Open burning of  
160 agricultural biomass: Physical and chemical properties of particle-phase emissions, *Atmos. Environ.*,  
161 39, 6747-6764, <https://doi.org/10.1016/j.atmosenv.2005.07.072>, 2005.
- 162 Hu, Y., Li, M., Yan, X., Zhang, C.: Characteristics and Interannual Variation of Chemical  
163 Components in Typical Road Dust in Beijing. *Environmental Science*, 40, 1645-1655,  
164 <https://doi.org/10.13227/j.hjcx.201808224>, 2019.
- 165 Liu, J., Li, J., Zhang, Y., Liu, D., Ding, P., Shen, C., Shen, K., He, Q., Ding, X., Wang, X., Chen, D.,  
166 Szidat, S., and Zhang, G.: Source Apportionment Using Radiocarbon and Organic Tracers for PM<sub>2.5</sub>  
167 Carbonaceous Aerosols in Guangzhou, South China: Contrasting Local- and Regional-Scale Haze  
168 Events, *Environ. Sci. Technol.*, 48, 12002-12011, [10.1021/es503102w](https://doi.org/10.1021/es503102w), 2014.
- 169 Mazzoleni, L. R., Zielinska, B., and Moosmüller, H.: Emissions of levoglucosan, methoxy phenols,  
170 and organic acids from prescribed burns, laboratory combustion of wildland fuels, and residential  
171 wood combustion, *Environ. Sci. Technol.*, 41, 2115-2122, <https://doi.org/10.1021/es061702c>, 2007.
- 172 Ni, H. Y., Huang, R.-J., Cao, J. J., Liu, W. G., Zhang, T., Wang, M., Meijer, H. A. J., and Dusek, U.:  
173 Source apportionment of carbonaceous aerosols in Xi'an, China: insights from a full year of  
174 measurements of radiocarbon and the stable isotope <sup>13</sup>C, *Atmos. Chem. Phys.*, 18, 16363-16383,  
175 <https://doi.org/10.5194/acp-18-16363-2018>, 2018.
- 176 Ni, H. Y., Huang, R. J., Cao, J. J., Dai, W. T., Zhou, J. M., Deng, H. Y., Aerts-Bijma, A., Meijer, H.  
177 A. J., and Dusek, U.: High contributions of fossil sources to more volatile organic aerosol,  
178 *Atmospheric Chemistry and Physics*, 19, 10405-10422, [10.5194/acp-19-10405-2019](https://doi.org/10.5194/acp-19-10405-2019), 2019.
- 179 Sang-Arlt, X., Fu, H. X., Zhang, Y. A., Ding, X., Wang, X. M., Zhou, Y. N., Zou, L. L., Zellmer, G.  
180 F., and Engling, G.: Carbonaceous aerosol emitted from biofuel household stove combustion in  
181 South China, *Atmosphere*, 11, 112, <https://doi.org/10.3390/atmos11010112>, 2020.
- 182 Schauer, J. J., Kleeman, M. J., Cass, G. R., and Simoneit, B. R. T.: Measurement of emissions from  
183 air pollution sources. 3. C<sub>1</sub>-C<sub>29</sub> organic compounds from fireplace combustion of wood, *Environ. Sci.*  
184 *Technol.*, 35, 1716-1728, <https://doi.org/10.1021/es001331e>, 2001.
- 185 Schmidl, C., Bauer, H., Dattler, A., Hitzemberger, R., Weissenboeck, G., Marr, I. L., and Puxbaum,  
186 H.: Chemical characterisation of particle emissions from burning leaves, *Atmos. Environ.*, 42,  
187 9070-9079, <https://doi.org/10.1016/j.atmosenv.2008.09.010>, 2008a.
- 188 Schmidl, C., Marr, L. L., Caseiro, A., Kotianová, P., Berner, A., Bauer, H., Kasper-Giebl, A., and  
189 Puxbaum, H.: Chemical characterisation of fine particle emissions from wood stove combustion of  
190 common woods growing in mid-European Alpine regions, *Atmos. Environ.*, 42, 126-141,  
191 <https://doi.org/10.1016/j.atmosenv.2007.09.028>, 2008b.

192 Srivastava, D., Xu, J., Vu, T. V., Liu, D., Li, L., Fu, P., Hou, S., Shi, Z., Harrison, R. M.: Insight into  
193 PM<sub>2.5</sub> sources by applying Positive Matrix factorization (PMF) at an urban and rural site of Beijing,  
194 (in review), 2020.

195

196 Sun, J., Shen, Z. X., Zhang, Y., Zhang, Q., Lei, Y. L., Huang, Y., Niu, X. Y., Xu, H. M., Cao, J. J.,  
197 Ho, S. S. H., and Li, X. X.: Characterization of PM<sub>2.5</sub> source profiles from typical biomass burning  
198 of maize straw, wheat straw, wood branch, and their processed products (briquette and charcoal) in  
199 China, *Atmos. Environ.*, 205, 36-45, <https://doi.org/10.1016/j.atmosenv.2019.02.038>, 2019.

200 Uematsu, M., Duce, R. A., Prospero, J. M., Chen, L., Merrill, J. T., and McDonald, R. L.: Transport  
201 of mineral aerosol from Asia Over the North Pacific Ocean, *Journal of Geophysical Research:*  
202 *Oceans*, 88, 5343-5352, <https://doi.org/10.1029/JC088iC09p05343>, 1983.

203 Xu, J., Srivastava, D., Wu, X., Hou, S., Vu, Tuan V., Liu, D., Sun, Y., Vlachou, A., Moschos, V.,  
204 Salazar, G., Szidat, S., Prévôt, A. S. H., Fu, P., Harrison, R. M., and Shi, Z.: An evaluation of source  
205 apportionment of fine OC and PM<sub>2.5</sub> by multiple methods: APHH-Beijing campaigns as a case study,  
206 *Faraday Discussions*, <https://doi.org/10.1039/D0FD00095G>, 2021.

207 Wang, Z., Bi, X., Sheng, G., and Fu, J.: Characterization of organic compounds and molecular  
208 tracers from biomass burning smoke in South China I: Broad-leaf trees and shrubs, *Atmos. Environ.*,  
209 43, 3096-3102, <https://doi.org/10.1016/j.atmosenv.2009.03.012>, 2009.

210 Yan, C., Zheng, M., Sullivan, A. P., Shen, G., Chen, Y., Wang, S., Zhao, B., Cai, S., Desyaterik, Y.,  
211 Li, X., Zhou, T., Gustafsson, Ö., and Collett, Jr. J. L.: Residential coal combustion as a source of  
212 levoglucosan in China, *Environ. Sci. Technol.*, 52, 1665-1674,  
213 <https://doi.org/10.1021/acs.est.7b05858>, 2018.

214 Zhang, X. Y., Gong, S. L., Shen, Z. X., Mei, F. M., Xi, X. X., Liu, L. C., Zhou, Z. J., Wang, D.,  
215 Wang, Y. Q., and Cheng, Y.: Characterization of soil dust aerosol in China and its transport and  
216 distribution during 2001 ACE-Asia: 1. Network observations, *Journal of Geophysical Research:*  
217 *Atmospheres*, 108, <https://doi.org/10.1029/2002JD002632>, 2003.

218 Zhang, X., Lu, Y., Wang, Q. G., and Qian, X.: A high-resolution inventory of air pollutant  
219 emissions from crop residue burning in China, *Atmos. Environ.*, 213, 207-214,  
220 <https://doi.org/10.1016/j.atmosenv.2019.06.009>, 2019.

221 Zhang, Y. L., Perron, N., Ciobanu, V. G., Zotter, P., Minguillón, M. C., Wacker, L., Prévôt, A. S. H.,  
222 Baltensperger, U., and Szidat, S.: On the isolation of OC and EC and the optimal strategy of  
223 radiocarbon-based source apportionment of carbonaceous aerosols, *Atmos. Chem. Phys*, 12, 10,841-  
224 10,856, <https://doi.org/10.5194/acp-12-10841-2012>, 2012.

- 225 Zhang, Y.-X., Shao, M., Zhang, Y.-H., Zeng, L.-M., He, L.-Y., Zhu, B., Wei, Y.-J., and Zhu, X.-L.:  
226 Source profiles of particulate organic matters emitted from cereal straw burnings, *J. Environ. Sci.*,  
227 19, 167-175, [https://doi.org/10.1016/S1001-0742\(07\)60027-8](https://doi.org/10.1016/S1001-0742(07)60027-8), 2007.
- 228 Zhao, X. Y., Hu, Q. H., Wang, X. M., Ding, X., He, Q. F., Zhang, Z., Shen, R. Q., Lu, S. J., Liu, T.  
229 Y., Fu, X. X., and Chen, L. G.: Composition profiles of organic aerosols from Chinese residential  
230 cooking: case study in urban Guangzhou, south China, *Journal of Atmospheric Chemistry*, 72, 1-18,  
231 [10.1007/s10874-015-9298-0](https://doi.org/10.1007/s10874-015-9298-0), 2015.
- 232 Zhou, Y., Xing, X., Lang, J., Chen, D., Cheng, S., Wei, L., Wei, X., and Liu, C.: A comprehensive  
233 biomass burning emission inventory with high spatial and temporal resolution in China, *Atmos.*  
234 *Chem. Phys.*, 17, 2839-2864, <https://doi.org/10.5194/acp-17-2839-2017>, 2017.

235 **Table S1.** Pearson correlations of species at IAP and PG sites.

| IAP winter        | PM <sub>2.5</sub> | OC   | EC    | K <sup>+</sup> | LG   | MN   | GA   |
|-------------------|-------------------|------|-------|----------------|------|------|------|
| PM <sub>2.5</sub> | 1.00              |      |       |                |      |      |      |
| OC                | 0.91              | 1.00 |       |                |      |      |      |
| EC                | 0.86              | 0.92 | 1.00  |                |      |      |      |
| K <sup>+</sup>    | 0.74              | 0.67 | 0.71  | 1.00           |      |      |      |
| LG                | 0.56              | 0.60 | 0.74  | 0.51           | 1.00 |      |      |
| MN                | 0.52              | 0.57 | 0.72  | 0.48           | 0.99 | 1.00 |      |
| GA                | 0.52              | 0.55 | 0.70  | 0.52           | 0.98 | 0.97 | 1.00 |
| PG winter         | PM <sub>2.5</sub> | OC   | EC    | K <sup>+</sup> | LG   | MN   | GA   |
| PM <sub>2.5</sub> | 1.00              |      |       |                |      |      |      |
| OC                | 0.95              | 1.00 |       |                |      |      |      |
| EC                | 0.85              | 0.93 | 1.00  |                |      |      |      |
| K <sup>+</sup>    | 0.88              | 0.78 | 0.70  | 1.00           |      |      |      |
| LG                | 0.89              | 0.89 | 0.81  | 0.86           | 1.00 |      |      |
| MN                | 0.85              | 0.85 | 0.82  | 0.84           | 0.94 | 1.00 |      |
| GA                | 0.88              | 0.85 | 0.74  | 0.84           | 0.95 | 0.94 | 1.00 |
| IAP summer        | PM <sub>2.5</sub> | OC   | EC    | K <sup>+</sup> | LG   | MN   | GA   |
| PM <sub>2.5</sub> | 1.00              |      |       |                |      |      |      |
| OC                | 0.72              | 1.00 |       |                |      |      |      |
| EC                | 0.34              | 0.79 | 1.00  |                |      |      |      |
| K <sup>+</sup>    | 0.65              | 0.64 | 0.36  | 1.00           |      |      |      |
| LG                | 0.52              | 0.59 | 0.36  | 0.85           | 1.00 |      |      |
| MN                | 0.47              | 0.55 | 0.37  | 0.80           | 0.97 | 1.00 |      |
| GA                | 0.41              | 0.59 | 0.54  | 0.59           | 0.79 | 0.85 | 1.00 |
| PG summer         | PM <sub>2.5</sub> | OC   | EC    | K <sup>+</sup> | LG   | MN   | GA   |
| PM <sub>2.5</sub> | 1.00              |      |       |                |      |      |      |
| OC                | 0.60              | 1.00 |       |                |      |      |      |
| EC                | 0.41              | 0.75 | 1.00  |                |      |      |      |
| K <sup>+</sup>    | 0.65              | 0.80 | 0.57  | 1.00           |      |      |      |
| LG                | 0.42              | 0.46 | 0.32  | 0.51           | 1.00 |      |      |
| MN                | 0.47              | 0.22 | -0.03 | 0.17           | 0.65 | 1.00 |      |
| GA                | 0.53              | 0.30 | 0.03  | 0.22           | 0.33 | 0.55 | 1.00 |

236 LG, MN and GA referred to levoglucosan, mannosan and galactosan, respectively.

237

**Table S2.** Summary of fire spot intensity, transport direction and sources of biomass burning.

| Site | Date       | PM <sub>2.5</sub><br>μg m <sup>-3</sup> | EC <sub>nf</sub><br>μg m <sup>-3</sup> | LG<br>ng m <sup>-3</sup> | Fire spots<br>intensity | Transport       | Sources of biomass<br>burning |
|------|------------|-----------------------------------------|----------------------------------------|--------------------------|-------------------------|-----------------|-------------------------------|
| IAP  | 2016/11/22 | 10.9                                    | 0.14                                   | 96.1                     | Low                     | from IM and HB  | Low intensity                 |
| IAP  | 2016/11/24 | 117.1                                   | 1.35                                   | 458.7                    | Low                     | from IM and HB  | Local                         |
| IAP  | 2016/11/26 | 209.4                                   | 1.43                                   | 227.4                    | High                    | from IM and HB  | Regional                      |
| IAP  | 2016/12/1  | 49.4                                    | 0.82                                   | 192.3                    | High                    | from IM and HB  | Regional                      |
| IAP  | 2016/12/2  | 98.6                                    | 1.51                                   | 515.4                    | High                    | from IM and HB  | Regional + local              |
| IAP  | 2016/12/3  | 239.9                                   | 1.94                                   | 634.8                    | Low                     | from HB and SX  | local                         |
| IAP  | 2016/12/4  | 128.6                                   | 1.02                                   | 321.7                    | Low                     | from IM and HB  | local                         |
| PG   | 2016/11/22 | 16.8                                    | 0.85                                   | 216.6                    | Low                     | from IM and HB  | Local                         |
| PG   | 2016/11/24 | 106.8                                   | 2.52                                   | 915.6                    | Low                     | from IM and HB  | Local                         |
| PG   | 2016/11/26 | 239.6                                   | 4.34                                   | 913.7                    | High                    | from IM and HB  | Regional + local              |
| PG   | 2016/12/1  | 41.0                                    | 1.22                                   | 311.2                    | High                    | from IM and HB  | Regional                      |
| PG   | 2016/12/2  | 138.2                                   | 1.34                                   | 780.0                    | High                    | from IM and HB  | Regional + local              |
| PG   | 2016/12/3  | 281.5                                   | 2.62                                   | 1406.3                   | Low                     | from HB and SX  | Strong local                  |
| PG   | 2016/12/4  | 294.3                                   | 2.70                                   | 1796.1                   | Low                     | from IM and HB  | Strong local                  |
| IAP  | 2017/5/24  | 12.2                                    | 0.55                                   | 13.0                     | High                    | from IM, LN, HB | Regional                      |
| IAP  | 2017/5/26  | 34.7                                    | 0.44                                   | 22.1                     | High                    | from IM, HB     | Regional                      |
| IAP  | 2017/5/27  | 78.8                                    | 0.49                                   | 20.1                     | High                    | from IM, HB     | Regional                      |
| IAP  | 2017/6/10  | 18.6                                    | 0.46                                   | 11.6                     | Low                     | from IM, LN, HB | Low intensity                 |
| IAP  | 2017/6/16  | 44.3                                    | 0.40                                   | 51.9                     | High                    | from SD, HB     | Regional + local              |
| IAP  | 2017/6/17  | 66.7                                    | 0.77                                   | 179.6                    | High                    | from SX, HB     | Regional + local              |
| PG   | 2017/5/26  | 37.4                                    | 0.58                                   | 56.4                     | High                    | from SD, HB     | Regional                      |
| PG   | 2017/5/27  | 70.3                                    | 0.85                                   | 89.8                     | High                    | from IM, HB     | Regional + local              |
| PG   | 2017/6/10  | 11.6                                    | 0.65                                   | 56.9                     | Low                     | from HB, TJ     | Local                         |
| PG   | 2017/6/16  | 47.4                                    | 0.72                                   | 107.1                    | Very high               | from HB         | Regional + local              |
| PG   | 2017/6/17  | 46.7                                    | 0.96                                   | 219.8                    | Very high               | from IM, SX, HB | Regional + local              |

239 IM: Inner Mongolia, HB: Hebei, SD: Shandong, SX: Shanxi, TJ: Tianjin

**Table S3.** Summary of EC/OC and OC/LG ratios of different biomass types and the ranges of fractions in LG.

| No. | Sample                      | EC/OC | OC/LG | Reference              |
|-----|-----------------------------|-------|-------|------------------------|
| 1   | Slash pine                  | 0.141 | 0.341 | Fine et al., 2002      |
| 2   | Ponderosa pine              | 0.014 | 7.83  | Fine et al., 2001      |
| 3   | Western hemlock             | 0.050 | 2.52  | Hays et al., 2002      |
| 4   | Loblolly pine               | 0.178 | 1.02  | Fine et al., 2002      |
| 5   | Douglas fir                 | 0.098 | 2.45  | Fine et al., 2004      |
| 6   | Eastern hemlock             | 0.053 | 10.5  | Fine et al., 2001      |
| 7   | White pine needle           | 0.078 | 7.18  | Mazzoleni et al., 2007 |
| 8   | Larch                       | 0.176 | 3.68  | Schmidl et al., 2008b  |
| 9   | Balsam fir                  | 0.066 | 12.3  | Fine et al., 2001      |
| 10  | Douglas fir (catalyst)      | 0.338 | 2.52  | Fine et al., 2004      |
| 11  | Loblolly pine               | 0.307 | 3.95  | Fine et al., 2004      |
| 12  | Chestnut oak                | 0.312 | 3.94  | Wang et al., 2009      |
| 13  | White pine needle           | 0.282 | 4.71  | Mazzoleni et al., 2007 |
| 14  | White pine needle           | 0.242 | 6.61  | Mazzoleni et al., 2007 |
| 15  | Spruce                      | 0.384 | 5.02  | Schmidl et al., 2008b  |
| 16  | Mixed wood                  | 0.288 | 6.76  | Mazzoleni et al., 2007 |
| 17  | White pine needle           | 0.331 | 6.64  | Mazzoleni et al., 2007 |
| 18  | Chinese evergreen Chinkapin | 0.078 | 33.8  | Wang et al., 2009      |
| 19  | Chinese red pine            | 0.375 | 8.33  | Sang-Arlt et al., 2020 |
| 20  | Cape jasmine                | 0.137 | 27.9  | Wang et al., 2009      |
| 21  | Ponderosa pine needles      | 0.401 | 10.2  | Mazzoleni et al., 2007 |
| 22  | Common aporusa              | 0.095 | 43.3  | Wang et al., 2009      |
| 23  | Samak                       | 0.054 | 137   | Wang et al., 2009      |
| 24  | Cedar wood                  | 0.090 | 96.9  | Mazzoleni et al., 2007 |
| 25  | Excelsior                   | 1.080 | 5.87  | Mazzoleni et al., 2007 |
| 26  | Excelsior                   | 1.090 | 6.13  | Mazzoleni et al., 2007 |
| 27  | Eastern white pine          | 0.426 | 19.1  | Fine et al., 2001      |
| 28  | Maritime pine               | 1.420 | 6.87  | Goncalves et al., 2010 |

| 29  | China fir                 | 0.651 | 16.7  | Sang-Arlt et al., 2020  |
|-----|---------------------------|-------|-------|-------------------------|
| 30  | Ponderosa pine needles    | 1.320 | 15.4  | Mazzoleni et al., 2007  |
| 31  | Cedar wood                | 0.264 | 94.4  | Mazzoleni et al., 2007  |
| 32  | Ponderosa pine needles    | 1.500 | 17.4  | Mazzoleni et al., 2007  |
| 33  | Wood                      | 0.500 | 55.6  | Schmidl et al., 2008a   |
| 34  | Ponderosa pine needles    | 0.632 | 55.4  | Mazzoleni et al., 2007  |
| 35  | Tamarak pine wood         | 0.330 | 137   | Mazzoleni et al., 2007  |
| 36  | Ponderosa pine sticks     | 3.320 | 20.1  | Mazzoleni et al., 2007  |
| 37  | Ponderosa pine sticks     | 3.680 | 25.6  | Mazzoleni et al., 2007  |
| 38  | Wood branch charcoal      | 0.393 | 625   | Sun et al., 2019        |
| 39  | Spruce with green needles | 0.401 | 2128  | Schmidl et al., 2008b   |
| 40  | Pine                      | 0.508 | 2128  | Schauer et al., 2001    |
| 41  | Pine with green needles   | 0.600 | 3571  | Schauer et al., 2001    |
| No. | Sample                    | EC/OC | OC/LG | Reference               |
| 42  | Wheat straw               | 0.223 | 4.07  | Sun et al., 2019        |
| 43  | Wheat straw               | 0.068 | 15.4  | Fushimi et al., 2017    |
| 44  | Wheat straw               | 0.083 | 15.2  | Fushimi et al., 2017    |
| 45  | Wheat straw               | 0.184 | 12.5  | Dhammapala et al., 2007 |
| 46  | Wheat straw               | 0.422 | 10    | Hays et al., 2005       |
| 47  | Wheat straw               | 0.510 | 9.09  | Mazzoleni et al., 2007  |
| 48  | Maize straw               | 0.257 | 3.18  | Sun et al., 2019        |
| 49  | Maize straw               | 0.106 | 55.6  | Yan et al., 2018        |
| 50  | Cereal straw              | 0.130 | 12    | Zhang et al., 2007      |

**Table S4.** The estimated  $OC/EC_{nf, min}$  and  $OC/EC_{f, min}$  ratios for IAP and PG sites during the whole winter and summer sampling period

|            | lowest 5<br>%<br>OC/EC | lowest 2<br>$\frac{f_{NF,OC}}{f_{NF,EC}}$ | lowest 2<br>$\left(\frac{1-f_{NF,OC}}{1-f_{NF,EC}}\right)$ | Estimated<br>OC/EC <sub>nf, min</sub> | Estimated<br>OC/EC <sub>f, min</sub> |
|------------|------------------------|-------------------------------------------|------------------------------------------------------------|---------------------------------------|--------------------------------------|
| IAP winter | 4.35                   | 0.70                                      | 0.96                                                       | 3.06                                  | 4.16                                 |
| PG winter  | 6.27                   | 0.76                                      | 0.81                                                       | 4.76                                  | 5.09                                 |
| IAP summer | 4.65                   | 0.73                                      | 0.78                                                       | 3.41                                  | 3.62                                 |
| PG summer  | 4.45                   | 0.88                                      | 0.62                                                       | 3.92                                  | 2.76                                 |

$f_{NF, OC}$  and  $f_{NF, EC}$  are the non-fossil fractions of OC and EC,  $(1 - f_{NF, OC})$  and  $(1 - f_{NF, EC})$  are the fossil fractions of OC and EC.



**Table S5.** Summary of Cholesterol and element concentrations, EFs, OC<sub>ck-ch</sub>, OC<sub>onf</sub>, OC<sub>dt</sub> and OC<sub>dt-Al</sub>.

| Site | Date       | Cholesterol<br>ng m <sup>-3</sup> | Si<br>ng m <sup>-3</sup> | Al<br>ng m <sup>-3</sup> | Fe<br>ng m <sup>-3</sup> | Ti<br>ng m <sup>-3</sup> | OC <sub>ck-ch</sub><br>μg m <sup>-3</sup> | OC <sub>onf</sub><br>μg m <sup>-3</sup> | EF(Si) | EF(Fe) | EF (Ti) | OC <sub>dt</sub><br>μg m <sup>-3</sup> | OC <sub>dt-Al</sub><br>μg m <sup>-3</sup> |
|------|------------|-----------------------------------|--------------------------|--------------------------|--------------------------|--------------------------|-------------------------------------------|-----------------------------------------|--------|--------|---------|----------------------------------------|-------------------------------------------|
| IAP  | 22/11/2016 | 1.10                              | 141.6                    | 68.8                     | 190.4                    | 34.6                     | 2.16                                      | -2.23                                   | 0.71   | 2.64   | 6.38    | 0.02-0.14                              | 0.03-0.15                                 |
| IAP  | 24/11/2016 | 1.39                              | 335.2                    | 229.5                    | 526.9                    | 8.8                      | 2.71                                      | -1.80                                   | 0.50   | 2.19   | 0.49    | 0.05-0.32                              | 0.10-0.50                                 |
| IAP  | 26/11/2016 | 1.08                              | 2819.5                   | 1372.1                   | 1053.1                   | 68.8                     | 2.11                                      | -0.11                                   | 0.71   | 0.73   | 0.64    | 0.41-2.70                              | 0.58-3.01                                 |
| IAP  | 01/12/2016 | 1.61                              | 459.7                    | 313.7                    | 350.7                    | 0.0                      | 3.15                                      | -2.22                                   | 0.51   | 1.06   | 0.00    | 0.07-0.44                              | 0.13-0.69                                 |
| IAP  | 02/12/2016 | 0.18                              | 778.7                    | 569.8                    | 435.8                    | 3.1                      | 0.36                                      | 0.62                                    | 0.47   | 0.73   | 0.07    | 0.11-0.75                              | 0.24-1.25                                 |
| IAP  | 03/12/2016 | 0.37                              | 1551.3                   | 1319.9                   | 1032.8                   | 25.6                     | 0.72                                      | 1.17                                    | 0.41   | 0.75   | 0.25    | 0.22-1.49                              | 0.55-2.90                                 |
| IAP  | 04/12/2016 | 1.73                              | 2244.7                   | 1635.2                   | 467.0                    | 18.3                     | 3.38                                      | -2.34                                   | 0.47   | 0.27   | 0.14    | 0.33-2.15                              | 0.69-3.59                                 |
| IAP  | 24/05/2017 | 0.46                              | 43.4                     | 25.0                     | 283.9                    | 5.7                      | 0.90                                      | 0.77                                    | 0.60   | 10.82  | 2.89    | 0.01-0.04                              | 0.01-0.05                                 |
| IAP  | 26/05/2017 | 1.14                              | 645.2                    | 297.3                    | 621.8                    | 27.6                     | 2.22                                      | -1.05                                   | 0.75   | 1.99   | 1.18    | 0.09-0.62                              | 0.12-0.65                                 |
| IAP  | 27/05/2017 | 1.65                              | 741.6                    | 346.6                    | 1149.8                   | 32.1                     | 3.22                                      | -1.83                                   | 0.74   | 3.16   | 1.17    | 0.11-0.71                              | 0.15-0.76                                 |
| IAP  | 10/06/2017 | 0.38                              | 1102.6                   | 466.2                    | 579.6                    | 32.7                     | 0.73                                      | 0.64                                    | 0.82   | 1.18   | 0.89    | 0.16-1.06                              | 0.20-1.02                                 |
| IAP  | 16/06/2017 | 0.40                              | 793.0                    | 302.9                    | 433.0                    | 37.3                     | 0.78                                      | -0.05                                   | 0.90   | 1.36   | 1.56    | 0.11-0.76                              | 0.13-0.67                                 |
| IAP  | 17/06/2017 | 1.00                              | 584.0                    | 188.2                    | 488.7                    | 19.9                     | 1.96                                      | -1.44                                   | 1.07   | 2.47   | 1.34    | 0.08-0.56                              | 0.08-0.41                                 |
| PG   | 22/11/2016 | 0.70                              | n.a                      | 55.8                     | 220.2                    | 18.9                     | 1.36                                      | 1.14                                    | n.a    | 3.76   | 4.30    | n.a                                    | 0.02-0.12                                 |
| PG   | 24/11/2016 | 1.25                              | n.a                      | 395.8                    | 1354.9                   | 51.9                     | 2.44                                      | 4.31                                    | n.a    | 3.26   | 1.66    | n.a                                    | 0.17-0.87                                 |
| PG   | 26/11/2016 | 1.75                              | n.a                      | 1153.9                   | 1979.3                   | 164.7                    | 3.42                                      | 9.65                                    | n.a    | 1.63   | 1.81    | n.a                                    | 0.48-2.53                                 |
| PG   | 01/12/2016 | 1.08                              | n.a                      | 111.2                    | 244.5                    | 2.6                      | 2.11                                      | 1.45                                    | n.a    | 2.09   | 0.30    | n.a                                    | 0.05-0.24                                 |
| PG   | 02/12/2016 | 0.94                              | n.a                      | 452.6                    | 625.0                    | 5.6                      | 1.84                                      | 1.03                                    | n.a    | 1.32   | 0.16    | n.a                                    | 0.19-0.99                                 |
| PG   | 03/12/2016 | 1.46                              | n.a                      | 897.2                    | 1206.4                   | 32.5                     | 2.85                                      | 3.17                                    | n.a    | 1.28   | 0.46    | n.a                                    | 0.38-1.97                                 |
| PG   | 04/12/2016 | 2.30                              | n.a                      | 322.1                    | 381.3                    | 7.0                      | 4.50                                      | 1.14                                    | n.a    | 1.13   | 0.28    | n.a                                    | 0.14-0.71                                 |
| PG   | 26/05/2017 | 0.31                              | 480.0                    | 273.3                    | 9.5                      | 29.4                     | 0.60                                      | 0.47                                    | 0.61   | 0.03   | 1.36    | 0.07-0.46                              | 0.11-0.60                                 |
| PG   | 27/05/2017 | 0.17                              | 736.9                    | 338.0                    | 17.5                     | 29.2                     | 0.34                                      | 1.87                                    | 0.75   | 0.05   | 1.10    | 0.11-0.71                              | 0.14-0.74                                 |
| PG   | 10/06/2017 | 0.65                              | 614.9                    | 257.1                    | 4.9                      | 24.7                     | 1.26                                      | 0.31                                    | 0.82   | 0.02   | 1.22    | 0.09-0.59                              | 0.11-0.56                                 |
| PG   | 16/06/2017 | 0.68                              | 786.8                    | 325.3                    | 9.2                      | 27.2                     | 1.32                                      | 5.92                                    | 0.83   | 0.03   | 1.06    | 0.11-0.75                              | 0.14-0.71                                 |
| PG   | 17/06/2017 | 0.55                              | 674.3                    | 217.7                    | 10.9                     | 23.3                     | 1.07                                      | 0.57                                    | 1.07   | 0.05   | 1.36    | 0.10-0.65                              | 0.09-0.48                                 |

1 **Table S6.** Correlations and slopes among WINSOC, WSOC, POC, SOC, OC<sub>bb</sub> and OC<sub>ck</sub> at IAP  
 2 and PG in winter and summer.

| x                 | y                    | IAP winter |                | PG winter |                | IAP summer |                | PG summer |                |
|-------------------|----------------------|------------|----------------|-----------|----------------|------------|----------------|-----------|----------------|
|                   |                      | slope      | R <sup>2</sup> | slope     | R <sup>2</sup> | slope      | R <sup>2</sup> | slope     | R <sup>2</sup> |
| POC <sub>f</sub>  | WINSOC <sub>f</sub>  | 1.11       | 0.97           | 1.23      | 0.97           | 0.92       | 0.93           | 0.84      | 0.82           |
|                   | WSOC <sub>f</sub>    | 0.57       | 0.99           | 0.61      | 0.84           | 0.96       | 0.92           | 0.58      | 0.55           |
| SOC <sub>f</sub>  | WINSOC <sub>f</sub>  | 1.53       | 0.96           | 1.27      | 0.89           | 0.99       | 0.91           | 0.98      | 0.45           |
|                   | WSOC <sub>f</sub>    | 0.78       | 0.93           | 0.69      | 0.96           | 1.05       | 0.93           | 0.89      | 0.67           |
| OC <sub>bb</sub>  | WINSOC <sub>nf</sub> | 1.59       | 1.00           | 2.38      | 0.94           | 1.16       | 0.44           | 1.58      | 0.91           |
|                   | WSOC <sub>nf</sub>   | 1.64       | 0.94           | 1.70      | 0.92           | 3.41       | 0.93           | 1.54      | 0.93           |
| OC <sub>ck</sub>  | WINSOC <sub>nf</sub> | 3.54       | 0.88           | 1.68      | 0.69           | 1.08       | 0.74           | 2.26      | 0.27           |
|                   | WSOC <sub>nf</sub>   | 3.83       | 0.94           | 1.21      | 0.69           | 1.53       | 0.19           | 2.29      | 0.32           |
| SOC <sub>nf</sub> | WINSOC <sub>nf</sub> | 0.85       | 0.98           | 0.98      | 0.83           | 0.42       | 0.65           | 0.79      | 0.92           |
|                   | WSOC <sub>nf</sub>   | 0.90       | 0.99           | 0.71      | 0.83           | 1.09       | 0.97           | 0.75      | 0.88           |

3 f: fossil sources, nf: non-fossil sources, bb: biomass burning, ck: cooking. Concentrations of fossil  
 4 and non-fossil sources of WINSOC and WSOC were from <sup>14</sup>C measurement. POC, SOC, OC<sub>bb</sub> and  
 5 OC<sub>ck</sub> are from extended Gelencsér method.

6

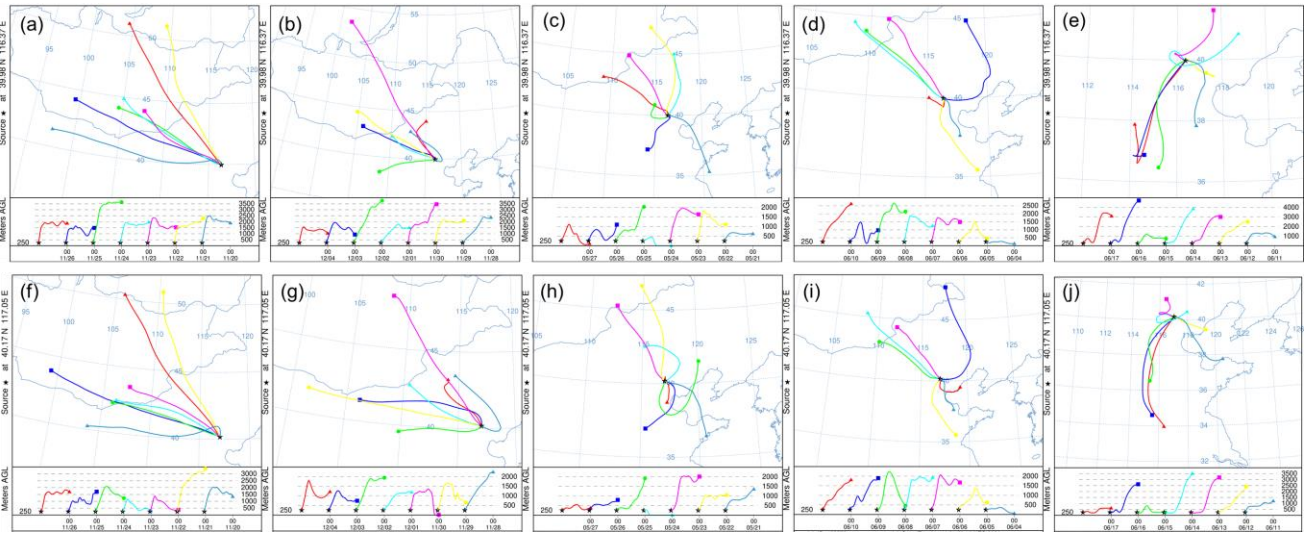

7

8 **Figure S1.** 48 h air-mass back trajectories with 24 h interval at 250 m, (a)-(e): destination at IAP,  
 9 (f)-(j): destination at PG. (<https://ready.arl.noaa.gov/HYSPLIT.php>, last access: 12 June 2020)

10

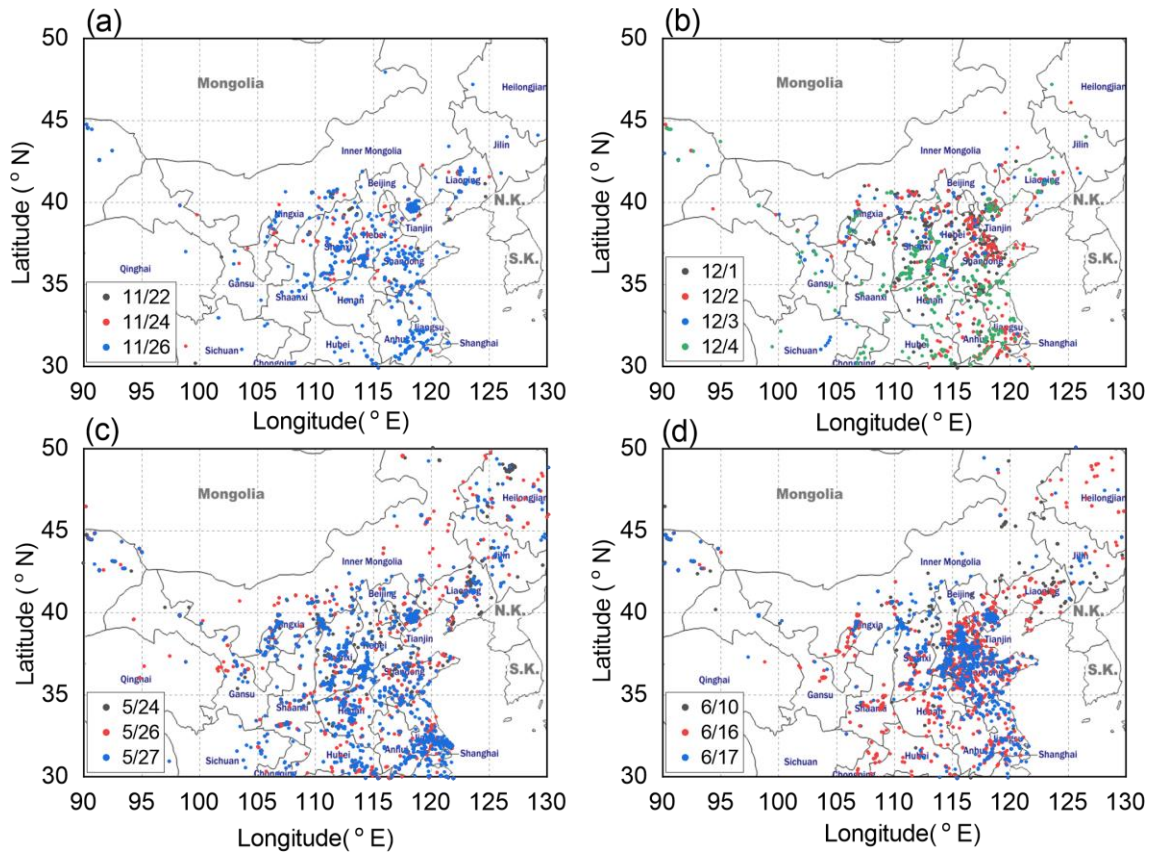

11

12 **Figure S2.** Fire spots observed by MODIS (AQUA/TERRA)

13 (<https://firms.modaps.eosdis.nasa.gov/alerts/>, last access: 16 April 2020) around Beijing, coloured  
 14 dots refer to fire spots on (a): 22, 24, 26 Nov 2016, (b): 1-4 Dec 2016, (c): 24, 26, 27 May 2017, (d)  
 15 10, 16, 17 Jun 2017.

16

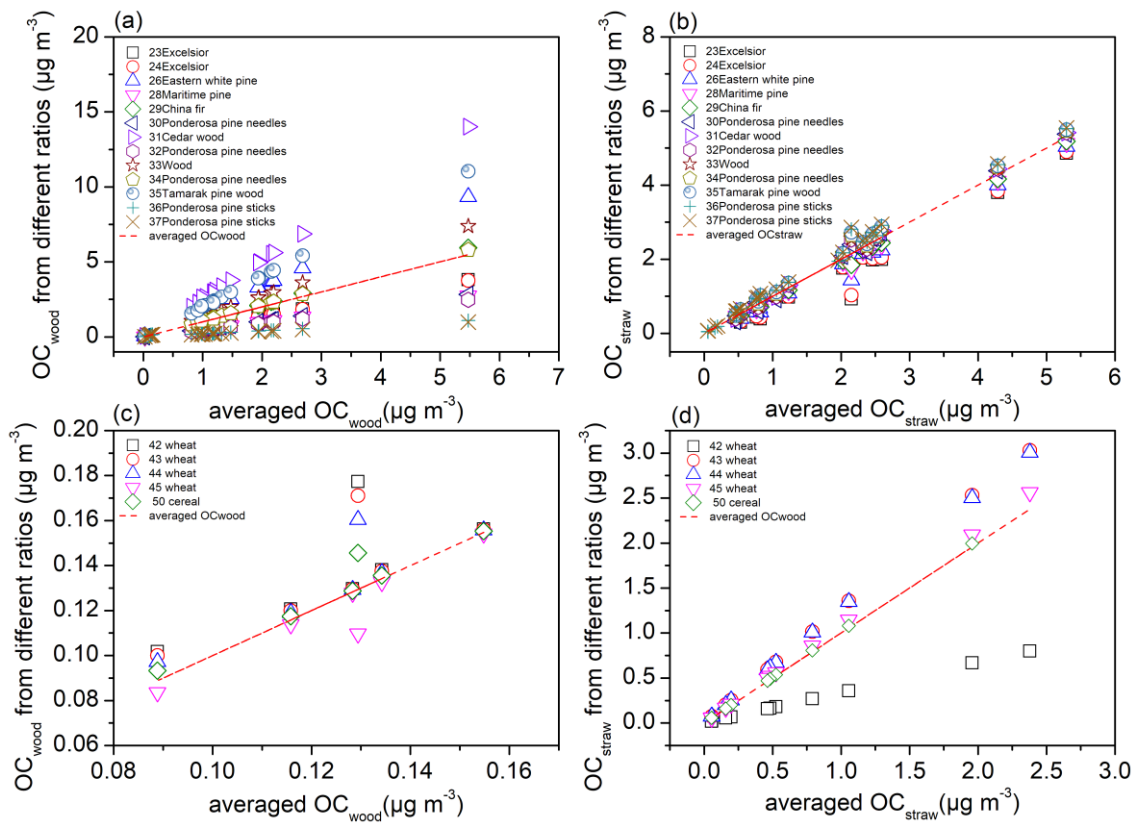

17

18 **Figure S3.** Correlations of averaged OC<sub>wood</sub> with OC<sub>wood</sub> from different ratios and averaged OC<sub>straw</sub>  
 19 with OC<sub>straw</sub> from different ratios. (a), the influence of ratios from softwood on the estimation of  
 20 OC<sub>wood</sub>; (b), the influence of ratios from softwood on the estimation of OC<sub>straw</sub>; (c), the influence of  
 21 ratios from wheat straws on the estimation of OC<sub>wood</sub>; (d), the influence of ratios from wheat straws  
 22 on the estimation of OC<sub>straw</sub>. As there is only one set of ratios from maize straw which matches the  
 23 selection limitation, the influence of ratios from maize straw was not plotted. The legends correspond  
 24 to the No. and types of samples in Table S3.

25

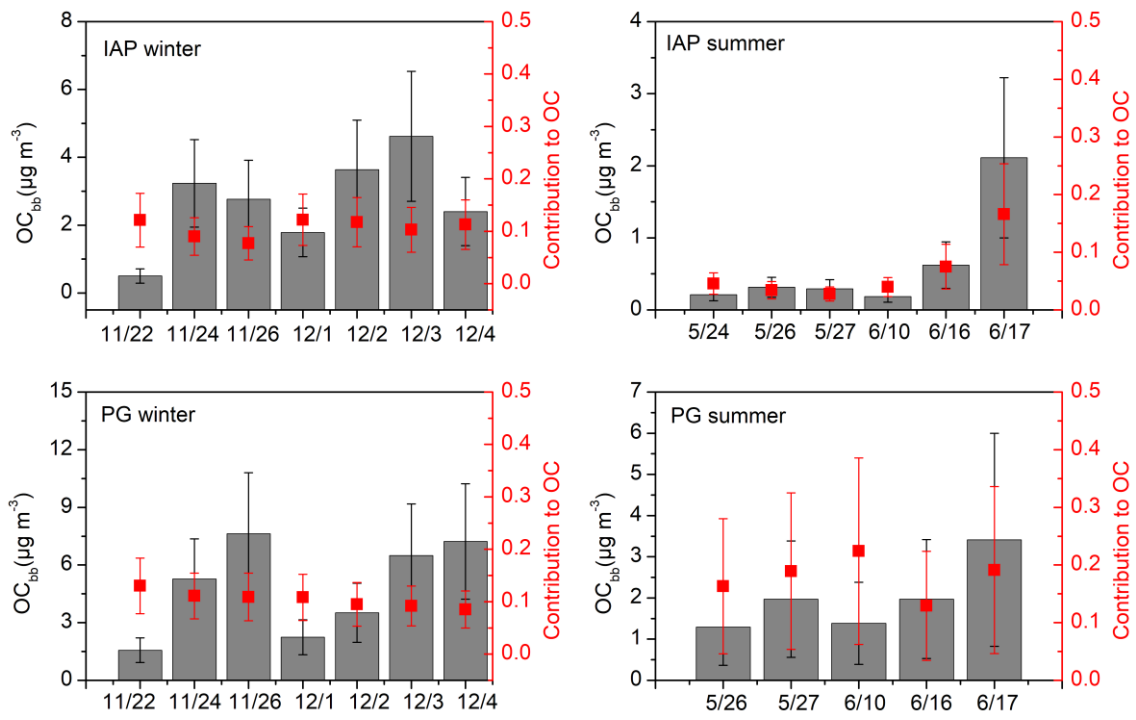

26

27 **Figure S4.** The mass concentrations and % contributions of OC<sub>bb</sub> at IAP and PG during winter and  
 28 summer.

29

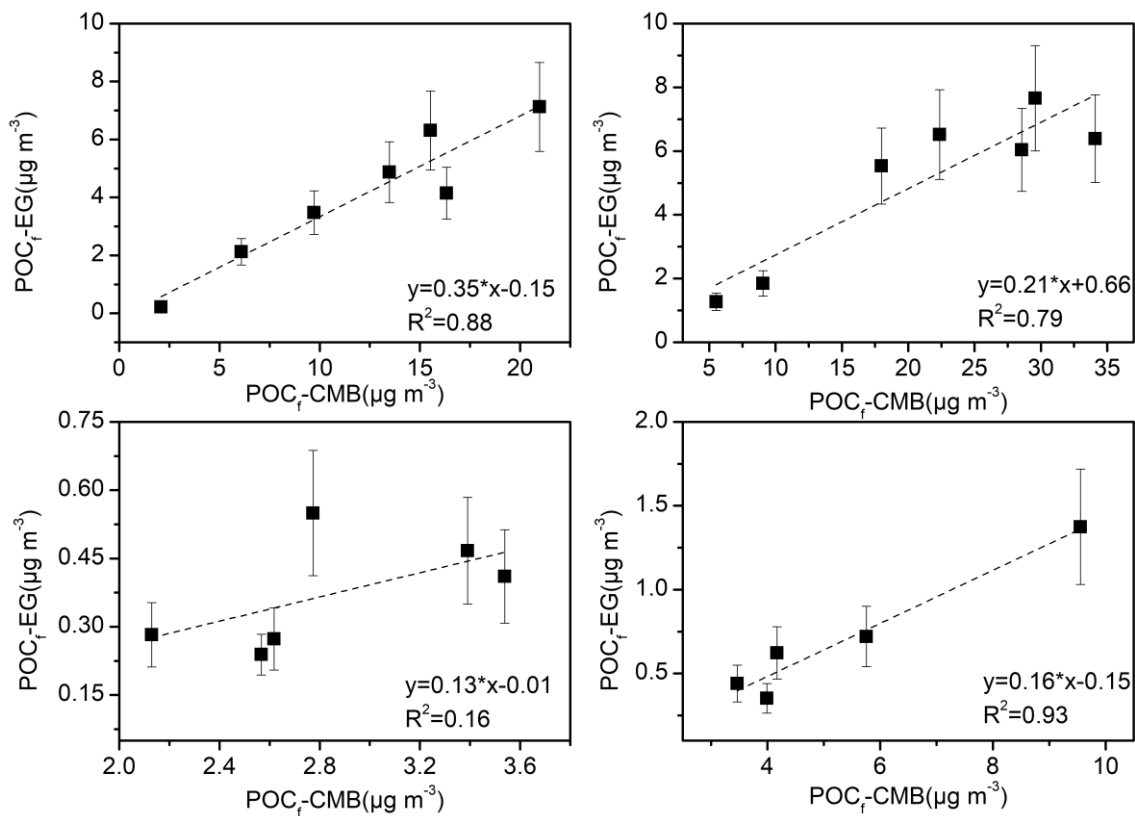

30

31 **Figure S5.** Correlations of POC<sub>f</sub> from the extended Gelencsér method (POC<sub>f</sub>-EG) and CMB if  
 32 using (POC/EC)<sub>f</sub> ratios 1.12–2.08 in winter, 0.40–0.77 in summer.

33

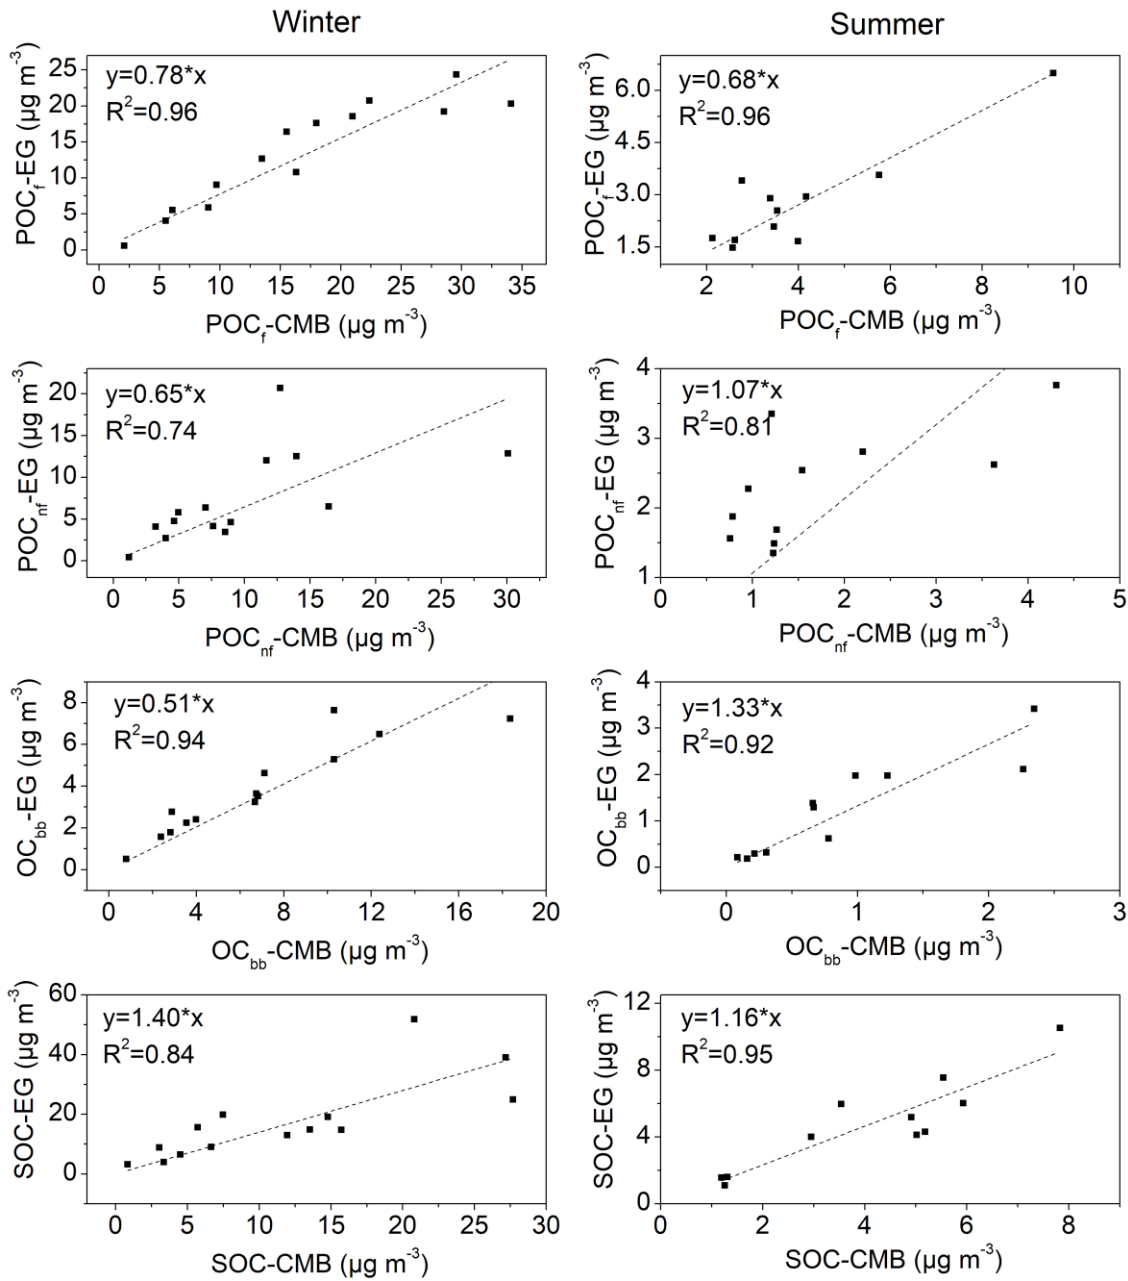

34

35 **Figure S6.** Correlations of OC sources from extended Gelencsér method with those from CMB  
 36 model in winter (left) and summer (right). EG denotes extended Gelencsér method.

37



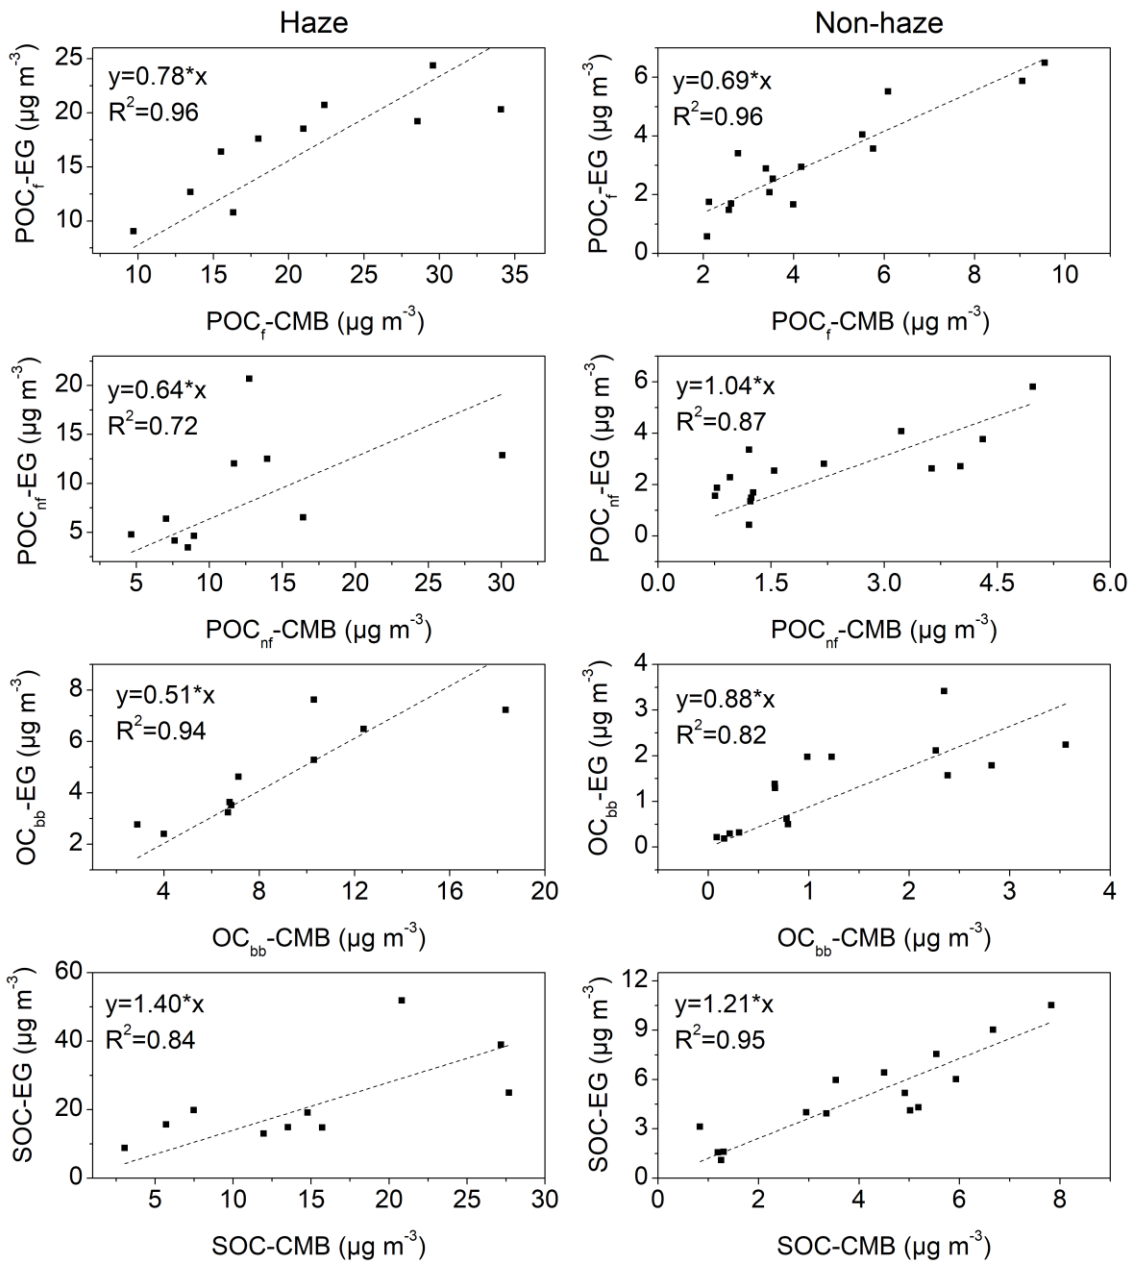

38

39

**Figure S7.** Correlations of OC sources from extended Gelencsér method with those from CMB model during haze period (left) and non-haze period (right). EG denotes extended Gelencsér method.

40

41

42

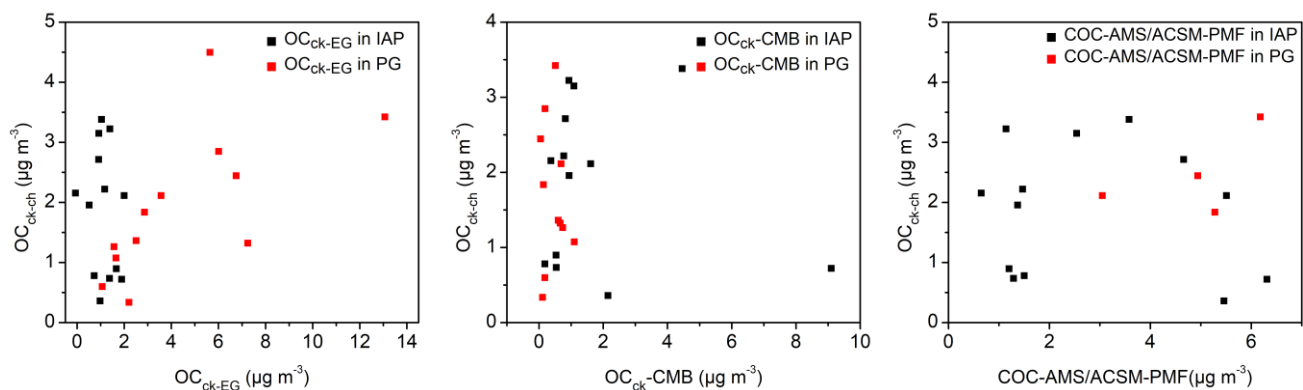

43

44

45 **Figure S8.** Correlations of  $OC_{ck-ch}$  with  $OC_{ck-EG}$ ,  $OC_{ck-CMB}$  and  $COC-AMS/ACSM-PMF$ .  $OC_{ck-ch}$ ,  
 46 OC from cooking from cholesterol concentrations and cholesterol to OC ratios;  $OC_{ck-EG}$ , OC from  
 47 cooking from extended Gelencsér method;  $OC_{ck-CMB}$ , OC from cooking from CMB model;  $COC-$   
 48  $AMS/ACSM-PMF$ , OC from cooking from AMS/ACSM-PMF model (AMS for IAP and ACSM for  
 49 PG).

50

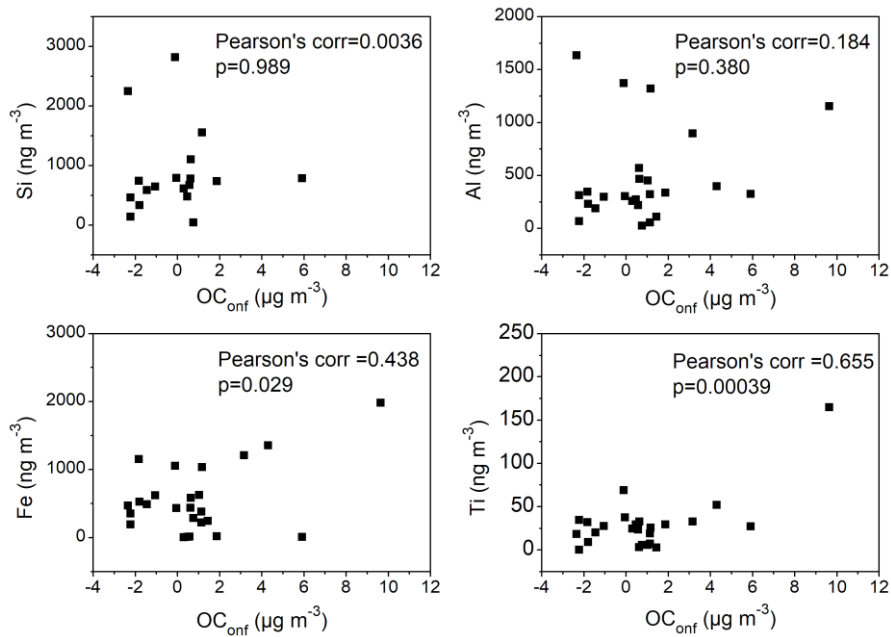

51  
52  
53  
54  
55  
56

**Figure S9.** Correlations of OC<sub>onf</sub> (=OC<sub>ck-EG</sub>-OC<sub>ck-ch</sub>) with Si (no data in winter campaign of PG), Al, Fe and Ti. OC<sub>ck-ch</sub>, OC from cooking from cholesterol concentrations and cholesterol to OC ratios; OC<sub>ck-EG</sub>, OC from cooking from extended Gelencsér method.
